# Supplementary material for: A Tumor Accelerator Based on Multicomponent Bone Scaffolds and Cancer Cell Homing
Source: MDPI journal article supplement (doi:10.3390/polym14163340), 2022-08-16
Supplement: s1 [file s1]

Article

# A Tumor Accelerator Based on Multicomponent Bone Scaffolds and Cancer Cell Homing

Chen-Ji Huang <sup>1</sup>, Pei-Kuan Chou <sup>1,2</sup>, Zong-Yi Sher <sup>1,2</sup>, You-Rong Chen <sup>1,3</sup>, Tan-Yueh Chen <sup>1</sup>  
and Guo-Chung Dong <sup>1,2,3,\*</sup>

<sup>1</sup> Institute of Biomedical Engineering and Nanomedicine, National Health Research Institutes, Miaoli 35053, Taiwan

<sup>2</sup> Graduate Program of Biotechnology in Medicine, National Tsing Hua University, Hsinchu 300044, Taiwan

<sup>3</sup> International Master Program of Translational Medicine, National United University, Miaoli 360301, Taiwan

\* Correspondence: gcdong@nhri.org.tw; Tel.: +886-37-246166#37135

## Supplementary Materials:

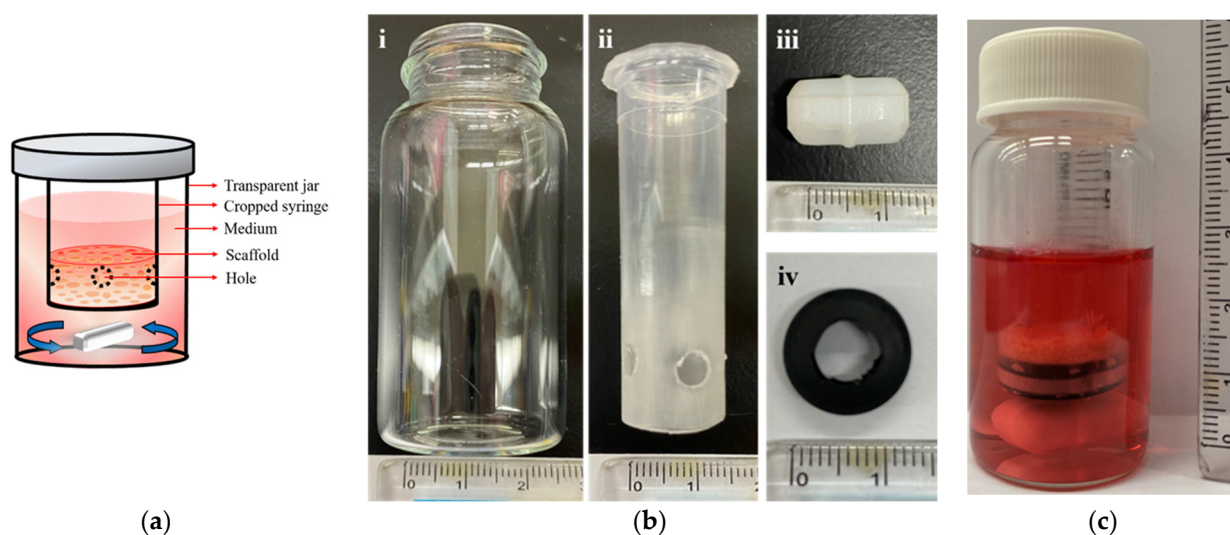

**Figure S1.** Bioreactor: (a) schematic diagram of the bioreactor; the holes around the syringe and the rotation of the stirrer below drive the disturbance of the culture medium, thereby achieving the effect of internal and external flow; (b) the composition of the bioreactor: 20 mL transparent glass jar, rubber stopper, cut and perforated syringe and stirrer (i: transparent jar; ii: rubber bung; iii: cropped syringe; iv: stirrer). (c) Entity diagram of the dynamic culture of bioreactor.

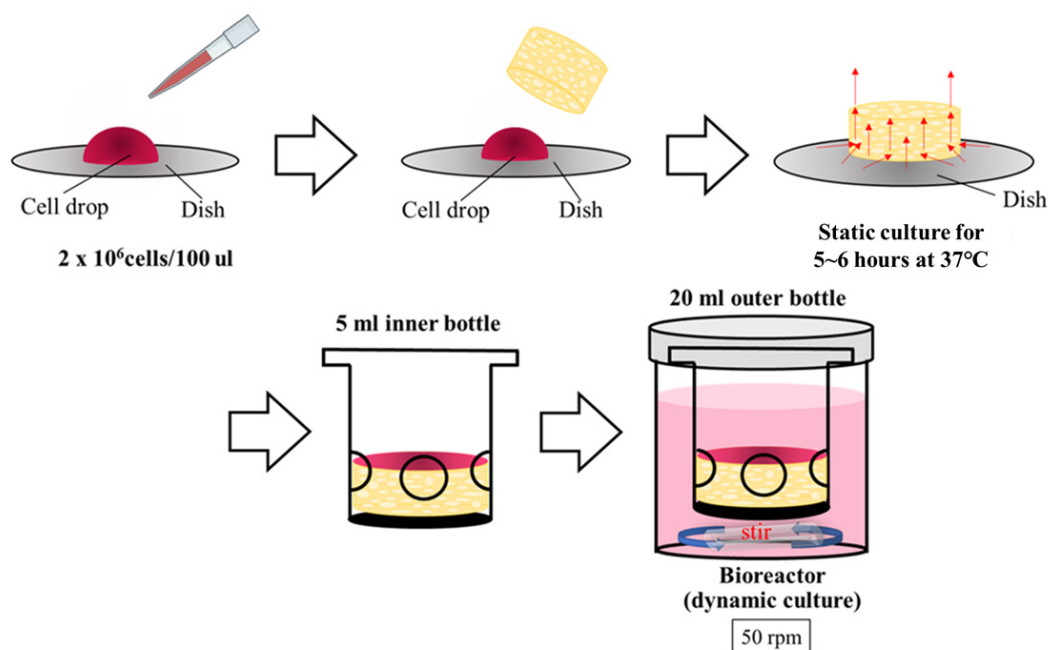

Figure S2. Simple flow chart of dynamic culture.

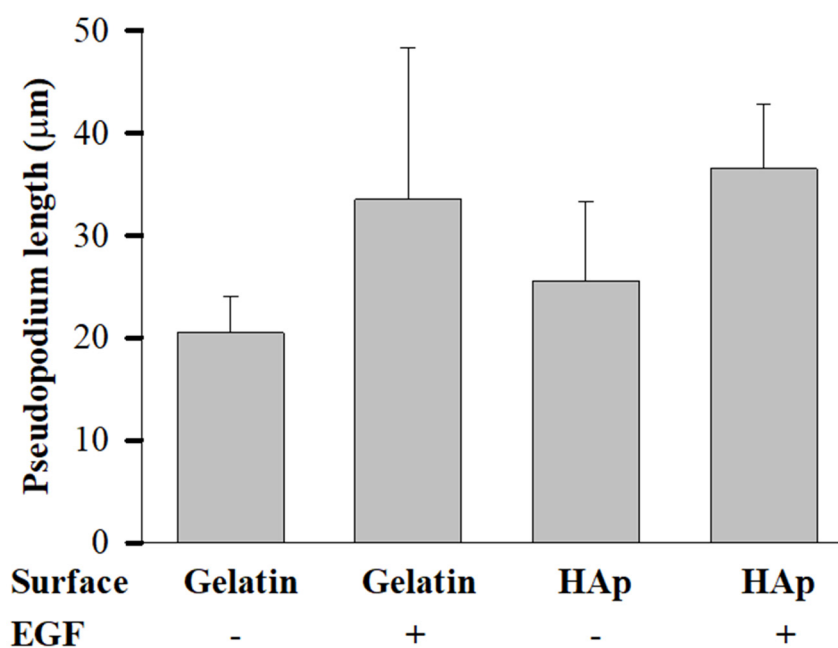

Figure S3. Pseudopodia measurement of MDA-MB-231 in dynamic culture on scaffold: the cell pseudopodia length adhered and proliferated on scaffold was measured for 3 days of dynamic culture. It was found that the cell pseudopodia in the gelatin part were shorter than those in the HAp part (20 vs. 25  $\mu$ m); when EGF was used, a reduction in the difference in pseudopodia length was observed between the two materials (35 vs. 38  $\mu$ m).
